# Supplementary material for: Glass Fibre-Reinforced Extrusion 3D-Printed Composites: Experimental and Numerical Study of Mechanical Properties
Source: MDPI journal article supplement (doi:10.3390/polym16020212), 2024-01-11
Supplement: s1 [file s1]

Supplementary Figure S1 Stress-Strain diagrams for the experiments (multiple curves shows the number of samples)

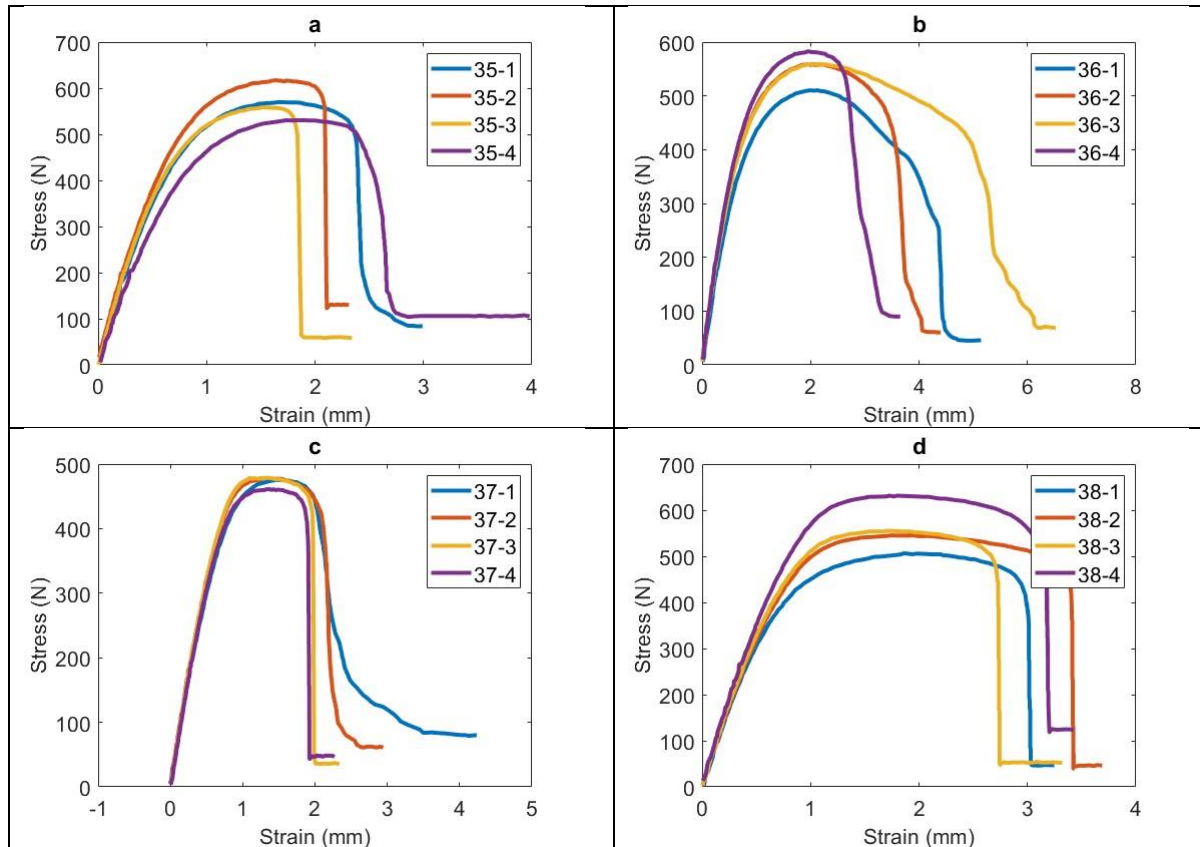

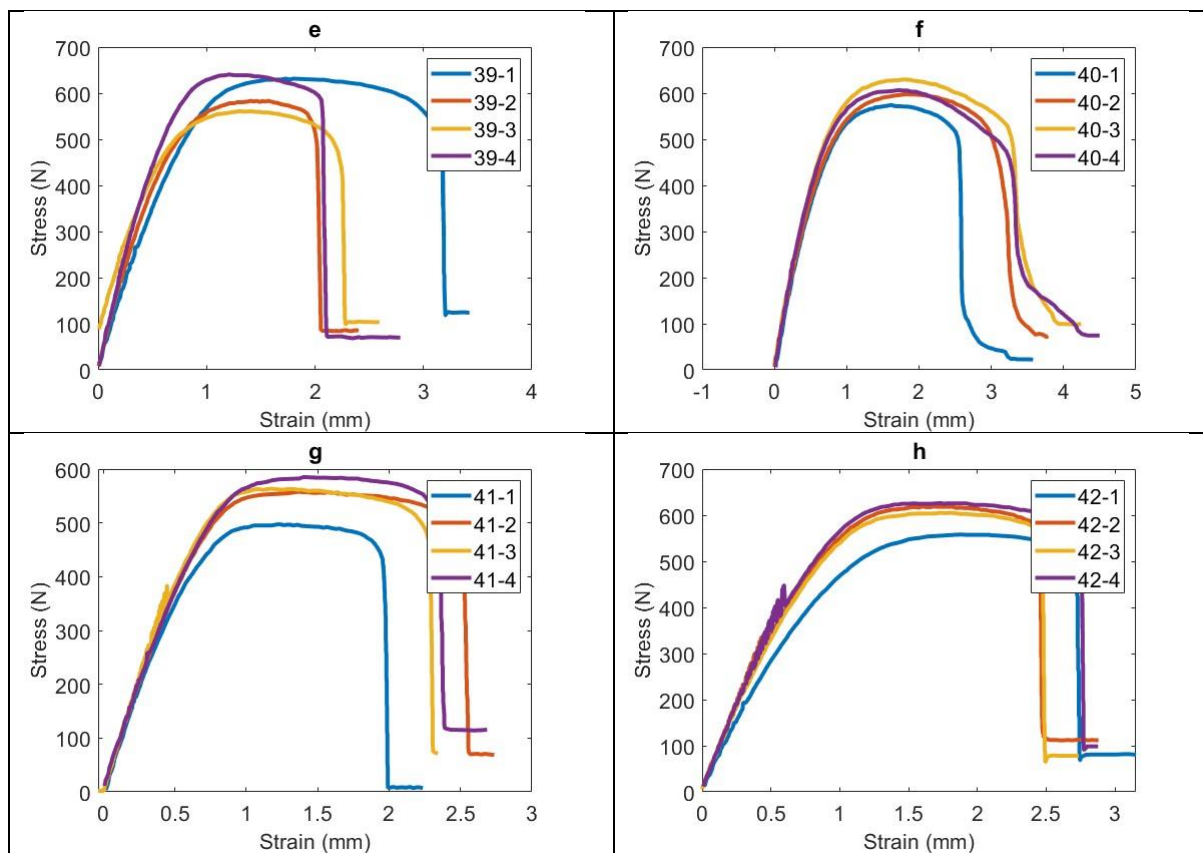

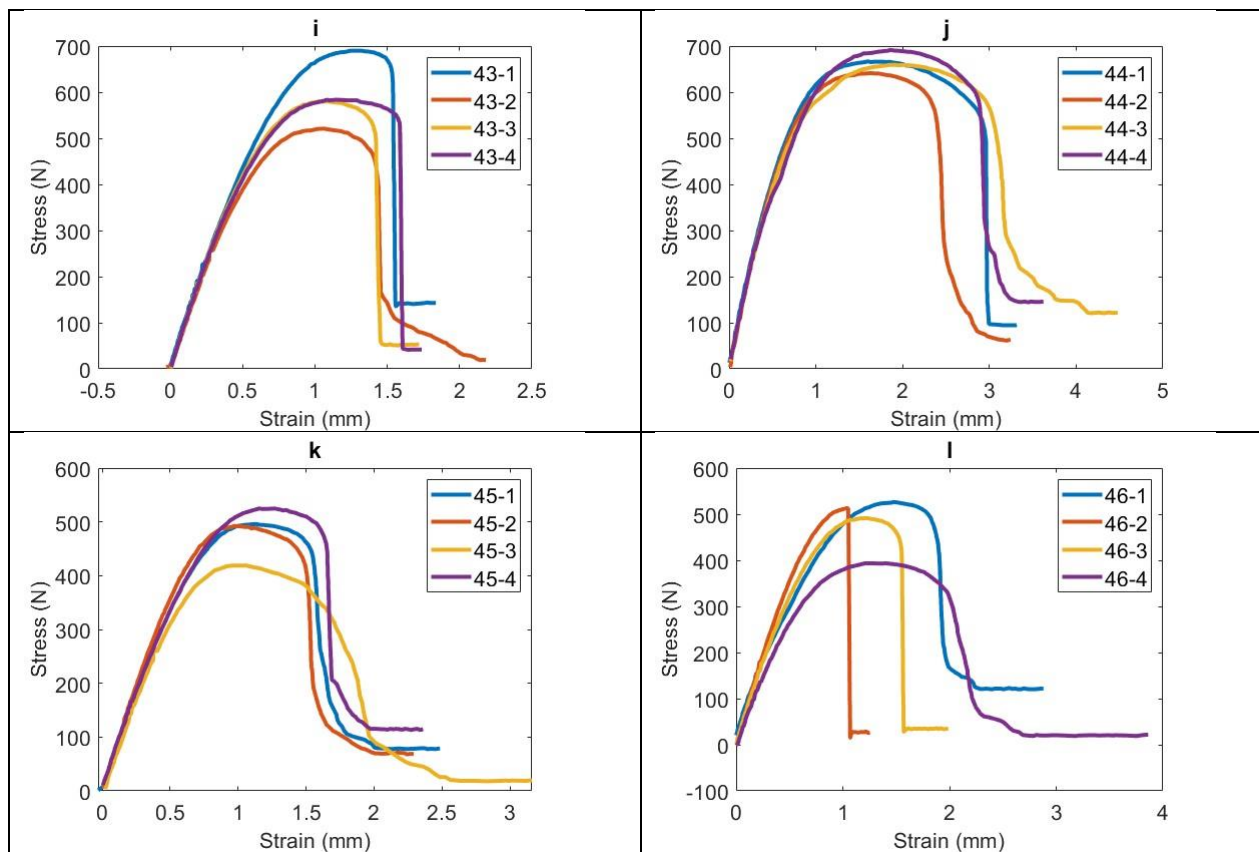

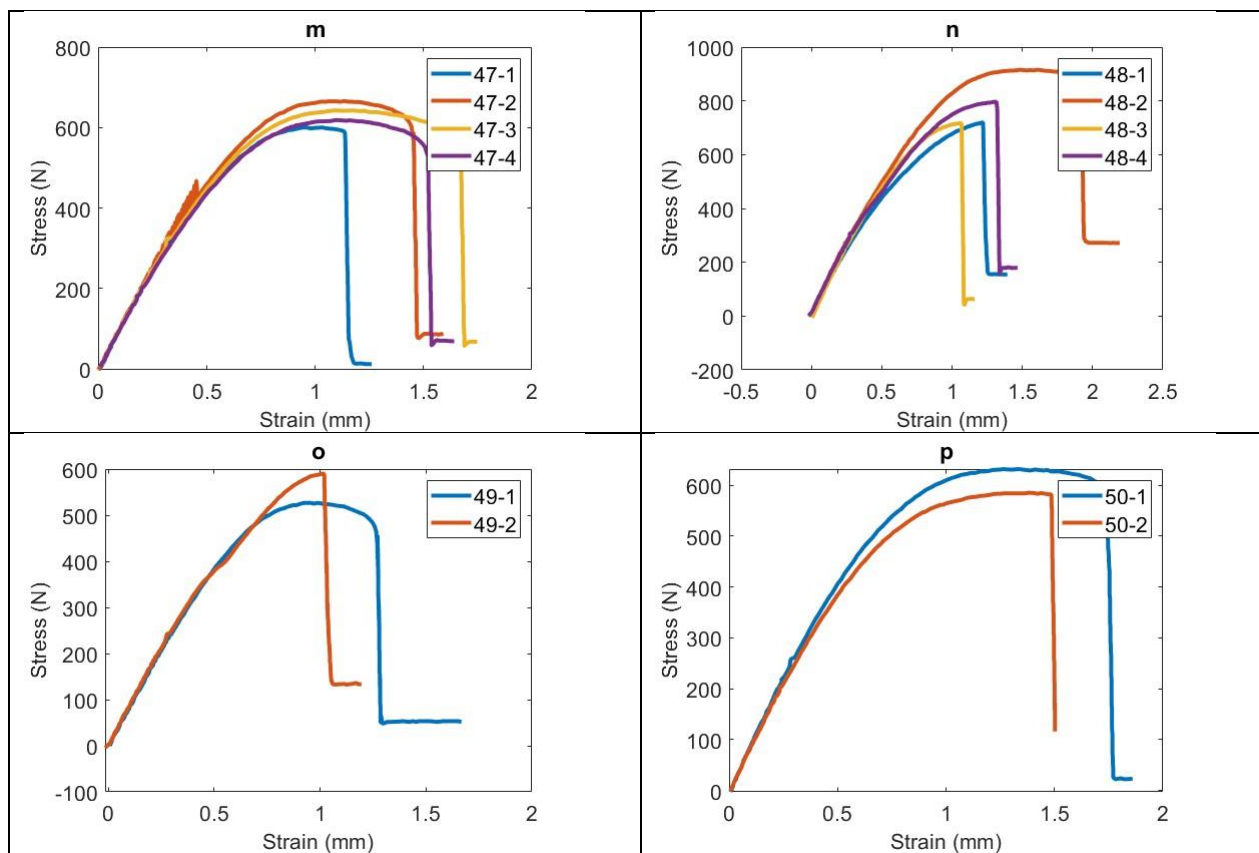

# Supplementary Table S1 Pearson correlation matrix confidence

|                                 | T            | D <sub>N</sub> | H <sub>L</sub> | α            | T · D <sub>N</sub> | T · H <sub>L</sub> | T · α        | D <sub>N</sub> · L <sub>H</sub> | D <sub>N</sub> · α | H <sub>L</sub> · α | σ <sub>t</sub> | E            | σ <sub>f</sub> |
|---------------------------------|--------------|----------------|----------------|--------------|--------------------|--------------------|--------------|---------------------------------|--------------------|--------------------|----------------|--------------|----------------|
| T                               | [-0.03,0.44] | [0.18,0.59]    | [0.16,0.58]    | [-0.25,0.25] | [-0.25,0.25]       | [-0.25,0.25]       | [-0.25,0.25] | [-0.25,0.25]                    | [-0.25,0.25]       | [-0.25,0.25]       | [-0.25,0.25]   | [-0.25,0.25] | [NaN,NaN]      |
| D <sub>N</sub>                  | [0.15,0.57]  | [0.00,0.47]    | [-0.24,0.25]   | [-0.25,0.25] | [-0.25,0.25]       | [-0.25,0.25]       | [-0.25,0.25] | [-0.25,0.25]                    | [-0.25,0.25]       | [-0.25,0.25]       | [-0.25,0.25]   | [-0.25,0.25] | [-0.25,0.25]   |
| H <sub>L</sub>                  | [-0.18,0.31] | [-0.03,0.44]   | [0.02,0.48]    | [-0.25,0.25] | [-0.25,0.25]       | [-0.25,0.25]       | [-0.25,0.25] | [-0.25,0.25]                    | [-0.25,0.25]       | [-0.25,0.25]       | [NaN,NaN]      | [-0.25,0.25] | [-0.25,0.25]   |
| α                               | [0.42,0.74]  | [0.62,0.84]    | [0.49,0.78]    | [-0.25,0.25] | [-0.25,0.25]       | [-0.25,0.25]       | [-0.25,0.25] | [-0.25,0.25]                    | [-0.25,0.25]       | [NaN,NaN]          | [-0.25,0.25]   | [-0.25,0.25] | [-0.25,0.25]   |
| T · D <sub>N</sub>              | [0.10,0.54]  | [-0.18,0.31]   | [-0.23,0.26]   | [-0.25,0.25] | [-0.25,0.25]       | [-0.25,0.25]       | [-0.25,0.25] | [-0.25,0.25]                    | [NaN,NaN]          | [-0.25,0.25]       | [-0.25,0.25]   | [-0.25,0.25] | [-0.25,0.25]   |
| T · H <sub>L</sub>              | [-0.24,0.25] | [-0.22,0.28]   | [-0.20,0.29]   | [-0.25,0.25] | [-0.25,0.25]       | [-0.25,0.25]       | [-0.25,0.25] | [NaN,NaN]                       | [-0.25,0.25]       | [-0.25,0.25]       | [-0.25,0.25]   | [-0.25,0.25] | [-0.25,0.25]   |
| T · α                           | [0.07,0.52]  | [-0.09,0.39]   | [-0.22,0.27]   | [-0.25,0.25] | [-0.25,0.25]       | [-0.25,0.25]       | [NaN,NaN]    | [-0.25,0.25]                    | [-0.25,0.25]       | [-0.25,0.25]       | [-0.25,0.25]   | [-0.25,0.25] | [-0.25,0.25]   |
| D <sub>N</sub> · L <sub>H</sub> | [-0.20,0.29] | [-0.20,0.29]   | [-0.20,0.29]   | [-0.25,0.25] | [-0.25,0.25]       | [NaN,NaN]          | [-0.25,0.25] | [-0.25,0.25]                    | [-0.25,0.25]       | [-0.25,0.25]       | [-0.25,0.25]   | [-0.25,0.25] | [-0.25,0.25]   |
| D <sub>N</sub> · α              | [0.12,0.55]  | [0.02,0.48]    | [0.22,0.62]    | [-0.25,0.25] | [NaN,NaN]          | [-0.25,0.25]       | [-0.25,0.25] | [-0.25,0.25]                    | [-0.25,0.25]       | [-0.25,0.25]       | [-0.25,0.25]   | [-0.25,0.25] | [-0.25,0.25]   |
| H <sub>L</sub> · α              | [-0.23,0.26] | [-0.22,0.27]   | [-0.20,0.29]   | [NaN,NaN]    | [-0.25,0.25]       | [-0.25,0.25]       | [-0.25,0.25] | [-0.25,0.25]                    | [-0.25,0.25]       | [-0.25,0.25]       | [-0.25,0.25]   | [-0.25,0.25] | [-0.25,0.25]   |
| σ <sub>t</sub>                  | [0.31,0.68]  | [0.65,0.86]    | [NaN,NaN]      | [-0.20,0.29] | [0.22,0.62]        | [-0.20,0.29]       | [-0.22,0.27] | [-0.20,0.29]                    | [-0.23,0.26]       | [0.49,0.78]        | [0.02,0.48]    | [-0.24,0.25] | [0.16,0.58]    |
| E                               | [0.19,0.59]  | [NaN,NaN]      | [0.65,0.86]    | [-0.22,0.27] | [0.02,0.48]        | [-0.20,0.29]       | [-0.09,0.39] | [-0.22,0.28]                    | [-0.18,0.31]       | [0.62,0.84]        | [-0.03,0.44]   | [0.00,0.47]  | [0.18,0.59]    |
| σ <sub>f</sub>                  | [NaN,NaN]    | [0.19,0.59]    | [0.31,0.68]    | [-0.23,0.26] | [0.12,0.55]        | [-0.20,0.29]       | [0.07,0.52]  | [-0.24,0.25]                    | [0.10,0.54]        | [0.42,0.74]        | [-0.18,0.31]   | [0.15,0.57]  | [-0.03,0.44]   |

## Supplementary Table S2 Specimen table

| No. | nozzle type | nozzle diameter (mm) | layer height (mm) | temperature (C°) | shell wall line count (-) | infill orientation (°) |
|-----|-------------|----------------------|-------------------|------------------|---------------------------|------------------------|
| 1   | MK8         | 0,6                  | 0,4               | 220              | 1                         | 45                     |
| 2   | MK8         | 0,6                  | 0,4               | 250              | 1                         | 45                     |
| 3   | MK8         | 0,6                  | 0,4               | 220              | 1                         | 45                     |
| 4   | MK8         | 0,6                  | 0,15              | 220              | 1                         | 45                     |
| 5   | MK8         | 0,6                  | 0,15              | 250              | 1                         | 45                     |
| 6   | MK8         | 0,6                  | 0,15              | 220              | 5                         | 45                     |
| 7   | MK8         | 0,6                  | 0,4               | 220              | 1                         | 0                      |
| 8   | MK8         | 0,6                  | 0,15              | 220              | 1                         | 0                      |
| 9   | MK8         | 0,6                  | 0,4               | 250              | 1                         | 0                      |
| 10  | MK8         | 0,6                  | 0,15              | 250              | 1                         | 0                      |
| 11  | MK8         | 0,6                  | 0,4               | 220              | 0                         | 0                      |
| 12  | MK8         | 0,6                  | 0,15              | 220              | 0                         | 0                      |
| 13  | MK8         | 0,6                  | 0,4               | 220              | 0                         | 45                     |
| 14  | MK8         | 0,6                  | 0,15              | 220              | 0                         | 45                     |
| 15  | MK8         | 0,6                  | 0,4               | 250              | 0                         | 90                     |
| 16  | MK8         | 0,6                  | 0,4               | 250              | 0                         | 45                     |
| 17  | MK8         | 0,6                  | 0,15              | 250              | 0                         | 0                      |
| 18  | MK8         | 0,6                  | 0,15              | 250              | 0                         | 45                     |
| 19  | MK8         | 0,3                  | 0,2               | 220              | 1                         | 45                     |
| 20  | MK8         | 0,3                  | 0,1               | 220              | 1                         | 0                      |
| 21  | MK8         | 0,3                  | 0,2               | 220              | 1                         | 0                      |
| 22  | MK8         | 0,3                  | 0,1               | 220              | 1                         | 45                     |
| 23  | MK8         | 0,3                  | 0,1               | 220              | 0                         | 0                      |
| 24  | MK8         | 0,3                  | 0,2               | 220              | 0                         | 0                      |

|    |     |     |      |     |   |    |
|----|-----|-----|------|-----|---|----|
| 25 | MK8 | 0,3 | 0,1  | 220 | 0 | 45 |
| 26 | MK8 | 0,3 | 0,2  | 220 | 0 | 45 |
| 27 | MK8 | 0,3 | 0,2  | 250 | 1 | 45 |
| 28 | MK8 | 0,3 | 0,1  | 250 | 1 | 0  |
| 29 | MK8 | 0,3 | 0,2  | 250 | 1 | 0  |
| 30 | MK8 | 0,3 | 0,1  | 250 | 1 | 45 |
| 31 | MK8 | 0,3 | 0,1  | 250 | 0 | 0  |
| 32 | MK8 | 0,3 | 0,2  | 250 | 0 | 0  |
| 33 | MK8 | 0,3 | 0,2  | 250 | 0 | 45 |
| 34 | MK8 | 0,3 | 0,1  | 250 | 0 | 45 |
| 35 | V6  | 0,4 | 0,1  | 220 | 0 | 0  |
| 36 | V6  | 0,4 | 0,25 | 220 | 0 | 0  |
| 37 | V6  | 0,4 | 0,1  | 220 | 0 | 45 |
| 38 | V6  | 0,4 | 0,25 | 220 | 0 | 45 |
| 39 | V6  | 0,4 | 0,1  | 250 | 0 | 0  |
| 40 | V6  | 0,4 | 0,25 | 250 | 0 | 0  |
| 41 | V6  | 0,4 | 0,1  | 250 | 0 | 45 |
| 42 | V6  | 0,4 | 0,25 | 250 | 0 | 45 |
| 43 | V6  | 0,8 | 0,2  | 220 | 0 | 0  |
| 44 | V6  | 0,8 | 0,5  | 220 | 0 | 0  |
| 45 | V6  | 0,8 | 0,5  | 220 | 0 | 45 |
| 46 | V6  | 0,8 | 0,5  | 220 | 0 | 45 |
| 47 | V6  | 0,8 | 0,2  | 250 | 0 | 0  |
| 48 | V6  | 0,8 | 0,5  | 250 | 0 | 0  |
| 49 | V6  | 0,8 | 0,2  | 250 | 0 | 45 |
| 50 | V6  | 0,8 | 0,5  | 250 | 0 | 45 |

# Supplementary Config file: all parameters

# generated by SuperSlicer 2.5.59 on 2023-05-15 at 12:40:43 UTC

allow\_empty\_layers = 0

avoid\_crossing\_not\_first\_layer = 1

avoid\_crossing\_perimeters = 1

avoid\_crossing\_perimeters\_max\_detour = 0

bed\_custom\_model =

bed\_custom\_texture =

bed\_shape = 0x0,400x0,400x400,0x400

bed\_temperature = 90

before\_layer\_gcode = ;BEFORE\_LAYER\_CHANGE\n;[layer\_z]\nG92 E0\n;if layer\_num == 2 }SET\_FILAMENT\_SENSOR SENSOR=my\_sensor  
ENABLE=1{endif}\n\n

between\_objects\_gcode =

bottom\_fill\_pattern = monotonic

bottom\_solid\_layers = 0

bottom\_solid\_min\_thickness = 0

bridge\_acceleration = 0

bridge\_angle = 0

bridge\_fan\_speed = 0



bridge\_fill\_pattern = rectilinear  
bridge\_flow\_ratio = 80%  
bridge\_internal\_acceleration = 0  
bridge\_internal\_fan\_speed = 0  
bridge\_overlap = 90%  
bridge\_overlap\_min = 80%  
bridge\_speed = 70%  
bridge\_speed\_internal = 150%  
bridge\_type = nozzle  
bridged\_infill\_margin = 200%  
brim\_acceleration = 0  
brim\_ears = 0  
brim\_ears\_detection\_length = 1  
brim\_ears\_max\_angle = 125  
brim\_ears\_pattern = concentric  
brim\_inside\_holes = 0  
brim\_separation = 0  
brim\_speed = 120%  
brim\_width = 5  
brim\_width\_interior = 0

```
chamber_temperature = 0
clip_multipart_objects = 1
color_change_gcode = M600
colorprint_heights =
compatible_printers_condition_cumulative = printer_model=~/*VC3_*/;
complete_objects = 0
complete_objects_one_brim = 0
complete_objects_one_skirt = 0
complete_objects_sort = object
cooling_tube_length = 5
cooling_tube_retraction = 91.5
curve_smoothing_angle_concave = 0
curve_smoothing_angle_convex = 0
curve_smoothing_cutoff_dist = 2
curve_smoothing_precision = 0
default_acceleration = 4500
default_filament_profile = "Generic PLA @RatRig"
default_print_profile = 0.20mm NORMAL @RatRig
default_speed = 40
deretract_speed = 45
```

disable\_fan\_first\_layers = 3  
dont\_support\_bridges = 1  
draft\_shield = disabled  
duplicate\_distance = 6  
end\_filament\_gcode = "; Filament-specific end gcode \n;END gcode for filament\n"  
end\_gcode = END\_PRINT\n  
enforce\_full\_fill\_volume = 0  
enforce\_retract\_first\_layer = 1  
ensure\_vertical\_shell\_thickness = 1  
exact\_last\_layer\_height = 0  
external\_infill\_margin = 150%  
external\_perimeter\_acceleration = 10%  
external\_perimeter\_cut\_corners = 0%  
external\_perimeter\_extrusion\_spacing =  
external\_perimeter\_extrusion\_width = 100%  
external\_perimeter\_fan\_speed = 0  
external\_perimeter\_overlap = 100%  
external\_perimeter\_speed = 80%  
external\_perimeters\_first = 0  
external\_perimeters\_hole = 1

external\_perimeters\_nothole = 1  
external\_perimeters\_vase = 0  
extra\_loading\_move = -2  
extra\_perimeters = 0  
extra\_perimeters\_odd\_layers = 0  
extra\_perimeters\_overhangs = 0  
extruder\_clearance\_height = 25  
extruder\_clearance\_radius = 45  
extruder\_colour = ""  
extruder\_fan\_offset = 0%  
extruder\_offset = 0x0  
extruder\_temperature\_offset = 0  
extrusion\_axis = E  
extrusion\_multiplier = 0.92  
extrusion\_spacing = 0  
extrusion\_width =  
fan\_always\_on = 0  
fan\_below\_layer\_time = 10  
fan\_kickstart = 0  
fan\_percentage = 0

fan\_speedup\_overhangs = 1  
fan\_speedup\_time = 0  
feature\_gcode =  
filament\_colour = #3A80CA  
filament\_cooling\_final\_speed = 3.4  
filament\_cooling\_initial\_speed = 2.2  
filament\_cooling\_moves = 4  
filament\_cooling\_zone\_pause = 0  
filament\_cost = 60  
filament\_custom\_variables = ""  
filament\_density = 1.24  
filament\_deretract\_speed = nil  
filament\_diameter = 1.75  
filament\_dip\_extraction\_speed = 70  
filament\_dip\_insertion\_speed = 33  
filament\_enable\_toolchange\_part\_fan = 0  
filament\_enable\_toolchange\_temp = 0  
filament\_load\_time = 0  
filament\_loading\_speed = 28  
filament\_loading\_speed\_start = 3

filament\_max\_overlap = 100%

filament\_max\_speed = 0

filament\_max\_volumetric\_speed = 4

filament\_max\_wipe\_tower\_speed = 0

filament\_melt\_zone\_pause = 0

filament\_minimal\_purge\_on\_wipe\_tower = 15

filament\_notes = ""

filament\_ramming\_parameters = "120 100 6.6 6.8 7.2 7.6 7.9 8.2 8.7 9.4 9.9 10.0| 0.05 6.6 0.45 6.8 0.95 7.8 1.45 8.3 1.95 9.7 2.45 10 2.95 7.6 3.45 7.6 3.95 7.6 4.45 7.6 4.95 7.6"

filament\_retract\_before\_travel = nil

filament\_retract\_before\_wipe = nil

filament\_retract\_layer\_change = nil

filament\_retract\_length = 2

filament\_retract\_lift = nil

filament\_retract\_lift\_above = nil

filament\_retract\_lift\_below = nil

filament\_retract\_restart\_extra = nil

filament\_retract\_speed = nil

filament\_seam\_gap = nil

filament\_settings\_id = "Esun ePA12 @RatRig - Copy20230313"

filament\_shrink = 100%  
filament\_skinnydip\_distance = 31  
filament\_soluble = 0  
filament\_spool\_weight = 0  
filament\_toolchange\_delay = 0  
filament\_toolchange\_part\_fan\_speed = 50  
filament\_toolchange\_temp = 200  
filament\_type = NYLON  
filament\_unload\_time = 0  
filament\_unloading\_speed = 90  
filament\_unloading\_speed\_start = 100  
filament\_use\_fast\_skinnydip = 0  
filament\_use\_skinnydip = 0  
filament\_vendor = Esun  
filament\_wipe = 1  
filament\_wipe\_advanced\_pigment = 0.5  
filament\_wipe\_extra\_perimeter = nil  
filament\_wipe\_inside\_depth = nil  
filament\_wipe\_inside\_end = nil  
filament\_wipe\_inside\_start = nil

filament\_wipe\_only\_crossing = nil

filament\_wipe\_speed = nil

fill\_angle = 0

fill\_angle\_increment = 0

fill\_density = 100%

fill\_pattern = rectilinear

fill\_smooth\_distribution = 10%

fill\_smooth\_width = 50%

fill\_top\_flow\_ratio = 100%

first\_layer\_acceleration = 10%

first\_layer\_acceleration\_overRAFT = 0

first\_layer\_bed\_temperature = 90

first\_layer\_extrusion\_spacing =

first\_layer\_extrusion\_width = 100%

first\_layer\_flow\_ratio = 100%

first\_layer\_height = 0.3

first\_layer\_infill\_speed = 0

first\_layer\_min\_speed = 20

first\_layer\_size\_compensation = -0.1

first\_layer\_size\_compensation\_layers = 1



first\_layer\_speed = 35%

first\_layer\_speed\_overRAFT = 30

first\_layer\_temperature = 285

full\_fan\_speed\_layer = 0

fuzzy\_skin = none

fuzzy\_skin\_point\_dist = 200%

fuzzy\_skin\_thickness = 150%

gap\_fill\_acceleration = 0

gap\_fill\_enabled = 1

gap\_fill\_extension = 0

gap\_fill\_flow\_match\_perimeter = 0%

gap\_fill\_last = 0

gap\_fill\_max\_width = 0

gap\_fill\_min\_area = 100%

gap\_fill\_min\_length = 0

gap\_fill\_min\_width = 0

gap\_fill\_overlap = 100%

gap\_fill\_speed = 80%

gcode\_comments = 0

gcode\_filename\_illegal\_char = [<>:"/\|?\*

gcode\_flavor = klipper  
gcode\_label\_objects = 1  
gcode\_precision\_e = 4  
gcode\_precision\_xyz = 3  
gcode\_resolution = 0  
gcode\_substitutions =  
high\_current\_on\_filament\_swap = 0  
hole\_size\_compensation = 0  
hole\_size\_threshold = 100  
hole\_to\_polyhole = 0  
hole\_to\_polyhole\_threshold = 0.01  
hole\_to\_polyhole\_twisted = 1  
host\_type = octoprint  
infill\_acceleration = 4500  
infill\_anchor = 600%  
infill\_anchor\_max = 5  
infill\_connection = connected  
infill\_connection\_bottom = connected  
infill\_connection\_bridge = connected  
infill\_connection\_solid = connected

infill\_connection\_top = connected

infill\_dense = 0

infill\_dense\_algo = autoenlarged

infill\_every\_layers = 1

infill\_extruder = 1

infill\_extrusion\_spacing =

infill\_extrusion\_width = 100%

infill\_first = 0

infill\_only\_where\_needed = 0

infill\_overlap = 18%

infill\_speed = 250%

inherits\_cumulative = "0.20mm NORMAL @RatRig";"Esun ePA-CF @RatRig";"RatRig V-Core-3-400"

init\_z\_rotate = 0

interface\_shells = 0

ironing = 0

ironing\_acceleration = 0

ironing\_angle = -1

ironing\_flowrate = 15%

ironing\_spacing = 0.1

ironing\_speed = 15

ironing\_type = top

layer\_gcode = ;AFTER\_LAYER\_CHANGE\n;[layer\_z]\n

layer\_height = 0.3

lift\_min = 0

machine\_limits\_usage = time\_estimate\_only

machine\_max\_acceleration\_e = 5000

machine\_max\_acceleration\_extruding = 9000

machine\_max\_acceleration\_retracting = 9000

machine\_max\_acceleration\_travel = 9000,1250

machine\_max\_acceleration\_x = 9000

machine\_max\_acceleration\_y = 9000

machine\_max\_acceleration\_z = 100

machine\_max\_feedrate\_e = 60

machine\_max\_feedrate\_x = 500

machine\_max\_feedrate\_y = 500

machine\_max\_feedrate\_z = 10

machine\_max\_jerk\_e = 5

machine\_max\_jerk\_x = 5

machine\_max\_jerk\_y = 5

machine\_max\_jerk\_z = 0.4

machine\_min\_extruding\_rate = 0

machine\_min\_travel\_rate = 0

max\_fan\_speed = 0

max\_gcode\_per\_second = 1500

max\_layer\_height = 0.5

max\_print\_height = 400

max\_print\_speed = 500

max\_speed\_reduction = 90%

max\_volumetric\_speed = 12

milling\_after\_z = 200%

milling\_diameter =

milling\_extra\_size = 150%

milling\_post\_process = 0

milling\_speed = 30

milling\_toolchange\_end\_gcode =

milling\_toolchange\_start\_gcode =

milling\_z\_lift =

min\_bead\_width = 85%

min\_fan\_speed = 0

min\_feature\_size = 0.1

min\_layer\_height = 0.2  
min\_length = 0.035  
min\_print\_speed = 15  
min\_skirt\_length = 20  
min\_width\_top\_surface = 100%  
mmu\_segmented\_region\_max\_width = 0  
model\_precision = 0.0001  
no\_perimeter\_unsupported\_algo = noperi  
notes =  
nozzle\_diameter = 0.8  
only\_one\_perimeter\_first\_layer = 0  
only\_one\_perimeter\_top = 0  
only\_one\_perimeter\_top\_other\_algo = 0  
only\_retract\_when\_crossing\_perimeters = 0  
ooze\_prevention = 0  
output\_filename\_format = {input\_filename\_base}\_{layer\_height}mm\_{filament\_type[0]}\_{print\_time}.gcode  
over\_bridge\_flow\_ratio = 100%  
overhangs\_acceleration = 0  
overhangs\_reverse = 0  
overhangs\_reverse\_threshold = 250%

overhangs\_speed = 100%  
overhangs\_width = 75%  
overhangs\_width\_speed = 55%  
parking\_pos\_retraction = 92  
pause\_print\_gcode = M601  
perimeter\_acceleration = 4500  
perimeter\_bonding = 0%  
perimeter\_extruder = 1  
perimeter\_extrusion\_spacing =  
perimeter\_extrusion\_width = 100%  
perimeter\_generator = classic  
perimeter\_loop = 0  
perimeter\_loop\_seam = rear  
perimeter\_overlap = 100%  
perimeter\_round\_corners = 0  
perimeter\_speed = 120%  
perimeters = 0  
physical\_printer\_settings\_id =  
post\_process =  
print\_custom\_variables =

print\_extrusion\_multiplier = 100%

print\_host =

print\_retract\_length = -1

print\_retract\_lift = -1

print\_settings\_id = NYLON RATRIG20230110probat04and08nozzle

print\_temperature = 0

printer\_custom\_variables =

printer\_model = VC3\_400

printer\_notes = Don't remove the following keywords! These keywords are used in the "compatible printer" condition of the print and filament profiles to link the particular print and filament profiles to this printer

profile.\nPRINTER\_VENDOR\_RatRig\nPRINTER\_MODEL\_VCORE\nPRINTER\_HAS\_Directextruder\nE3DV6

printer\_settings\_id = NYLON0.8mmRatRig V-Core-3-400first

printer\_technology = FFF

printer\_variant = 0.4

printer\_vendor =

printhost\_apikey =

printhost\_cafile =

printhost\_port =

raft\_contact\_distance = 0.1

raft\_expansion = 3

raft\_first\_layer\_density = 90%



raft\_first\_layer\_expansion = 6  
raft\_interface\_layer\_height = 0  
raft\_layer\_height = 0  
raft\_layers = 0  
remaining\_times = 1  
remaining\_times\_type = m73m117  
resolution = 0.0125  
resolution\_internal = 0.2  
retract\_before\_travel = 3  
retract\_before\_wipe = 0%  
retract\_layer\_change = 0  
retract\_length = 1  
retract\_length\_toolchange = 1  
retract\_lift = 0.2  
retract\_lift\_above = 0  
retract\_lift\_below = 0  
retract\_lift\_first\_layer = 1  
retract\_lift\_top = "All surfaces"  
retract\_restart\_extra = 0  
retract\_restart\_extra\_toolchange = 0

retract\_speed = 45

seam\_angle\_cost = 80%

seam\_gap = 15%

seam\_position = cost

seam\_travel\_cost = 20%

silent\_mode = 0

single\_extruder\_multi\_material = 0

single\_extruder\_multi\_material\_priming = 1

skirt\_brim = 0

skirt\_distance = 20

skirt\_distance\_from\_brim = 1

skirt\_extrusion\_width = 110%

skirt\_height = 1

skirts = 1

slice\_closing\_radius = 0.049

slicing\_mode = regular

slowdown\_below\_layer\_time = 10

small\_perimeter\_max\_length = 20

small\_perimeter\_min\_length = 6

small\_perimeter\_speed = 80%

solid\_fill\_pattern = rectilinear

solid\_infill\_acceleration = 0

solid\_infill\_below\_area = 0

solid\_infill\_every\_layers = 0

solid\_infill\_extruder = 1

solid\_infill\_extrusion\_spacing =

solid\_infill\_extrusion\_width = 100%

solid\_infill\_overlap = 100%

solid\_infill\_speed = 80%

solid\_over\_perimeters = 2

spiral\_vase = 0

standby\_temperature\_delta = -5

start\_filament\_gcode = "; Filament gcode\nSET\_GCODE\_OFFSET Z=0.0\n\n{if nozzle\_diameter[0]==0.4} SET\_PRESSURE\_ADVANCE ADVANCE=0.045{elsif nozzle\_diameter[0]==0.6}SET\_PRESSURE\_ADVANCE ADVANCE=0.02{endif}\n\n"

start\_gcode = START\_PRINT EXTRUDER\_TEMP=[first\_layer\_temperature] BED\_TEMP=[first\_layer\_bed\_temperature]

start\_gcode\_manual = 0

support\_material = 0

support\_material\_acceleration = 0

support\_material\_angle = 0

support\_material\_angle\_height = 0

support\_material\_auto = 0  
support\_material\_bottom\_contact\_distance = 0.2  
support\_material\_bottom\_interface\_layers = -1  
support\_material\_buildplate\_only = 1  
support\_material\_closing\_radius = 2  
support\_material\_contact\_distance = 50%  
support\_material\_contact\_distance\_type = filament  
support\_material\_enforce\_layers = 0  
support\_material\_extruder = 0  
support\_material\_extrusion\_width = 80%  
support\_material\_interface\_acceleration = 0  
support\_material\_interface\_angle = 90  
support\_material\_interface\_angle\_increment = 0  
support\_material\_interface\_contact\_loops = 0  
support\_material\_interface\_extruder = 0  
support\_material\_interface\_fan\_speed = -1  
support\_material\_interface\_layer\_height = 0  
support\_material\_interface\_layers = 2  
support\_material\_interface\_pattern = rectilinear  
support\_material\_interface\_spacing = 0.2

support\_material\_interface\_speed = 100%

support\_material\_layer\_height = 0

support\_material\_pattern = rectilinear

support\_material\_spacing = 2

support\_material\_speed = 80%

support\_material\_style = snug

support\_material\_synchronize\_layers = 0

support\_material\_threshold = 65

support\_material\_with\_sheath = 0

support\_material\_xy\_spacing = 60%

temperature = 285

template\_custom\_gcode =

thin\_perimeters = 80%

thin\_perimeters\_all = 20%

thin\_walls = 1

thin\_walls\_acceleration = 0

thin\_walls\_merge = 1

thin\_walls\_min\_width = 33%

thin\_walls\_overlap = 50%

thin\_walls\_speed = 100%

threads = 8

thumbnails = 32x32,400x300

thumbnails\_color = #018aff

thumbnails\_custom\_color = 0

thumbnails\_end\_file = 0

thumbnails\_format = PNG

thumbnails\_with\_bed = 1

time\_cost = 0

time\_estimation\_compensation = 100%

time\_start\_gcode = 20

time\_toolchange = 30

tool\_name = ""

toolchange\_gcode =

top\_fan\_speed = 0

top\_fill\_pattern = monotonic

top\_infill\_extrusion\_spacing =

top\_infill\_extrusion\_width = 100%

top\_solid\_infill\_acceleration = 0

top\_solid\_infill\_speed = 60%

top\_solid\_layers = 0

top\_solid\_min\_thickness = 0  
travel\_acceleration = 4500  
travel\_deceleration\_use\_target = 1  
travel\_speed = 400  
travel\_speed\_z = 0  
use\_firmware\_retraction = 0  
use\_relative\_e\_distances = 1  
use\_volumetric\_e = 0  
variable\_layer\_height = 1  
wall\_add\_middle\_threshold = 75%  
wall\_distribution\_count = 1  
wall\_split\_middle\_threshold = 50%  
wall\_transition\_angle = 10  
wall\_transition\_filter\_deviation = 25%  
wall\_transition\_length = 0.4  
wipe = 0  
wipe\_advanced = 0  
wipe\_advanced\_algo = linear  
wipe\_advanced\_multiplier = 60  
wipe\_advanced\_nozzle\_melted\_volume = 120

wipe\_extra\_perimeter = 0  
wipe\_inside\_depth = 50%  
wipe\_inside\_end = 1  
wipe\_inside\_start = 0  
wipe\_into\_infill = 0  
wipe\_into\_objects = 0  
wipe\_only\_crossing = 1  
wipe\_speed = 0  
wipe\_tower = 0  
wipe\_tower\_bridging = 10  
wipe\_tower\_brim\_width = 2  
wipe\_tower\_no\_sparse\_layers = 0  
wipe\_tower\_rotation\_angle = 0  
wipe\_tower\_width = 60  
wipe\_tower\_x = 170  
wipe\_tower\_y = 140  
wiping\_volumes\_extruders = 70,70  
wiping\_volumes\_matrix = 0  
xy\_inner\_size\_compensation = 0  
xy\_size\_compensation = 0



`z_offset = -0.05`

`z_step = 0.005`
